# Supplementary material for: New insights into light spectral quality inhibits the plasticity elongation of maize mesocotyl and coleoptile during seed germination
Source: PubMed Central journal article supplement (PMC10050570; doi:10.3389/fpls.2023.1152399), 2023-03-15
Supplement: DataSheet_1.pdf [file DataSheet_1.pdf]

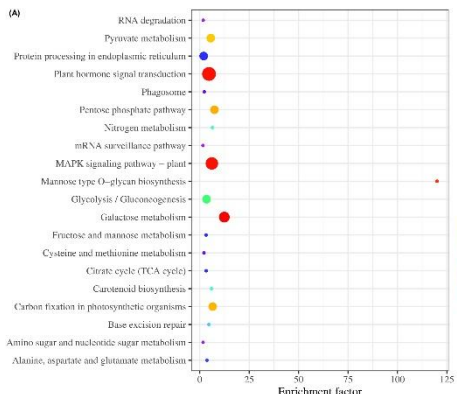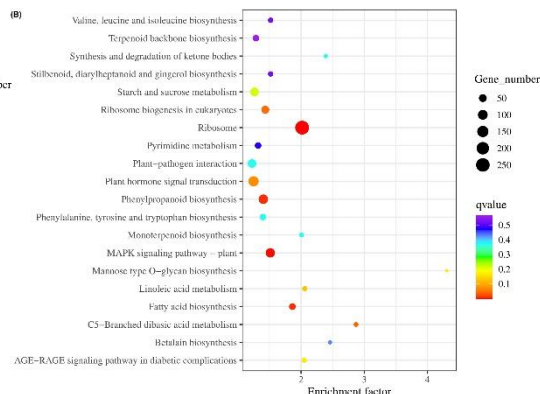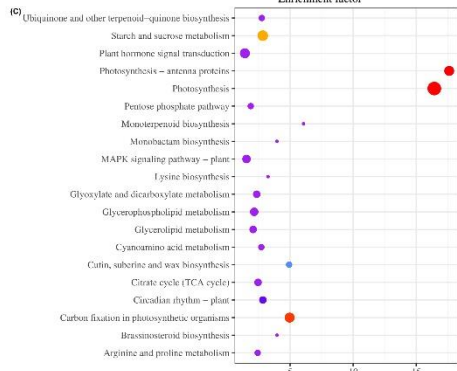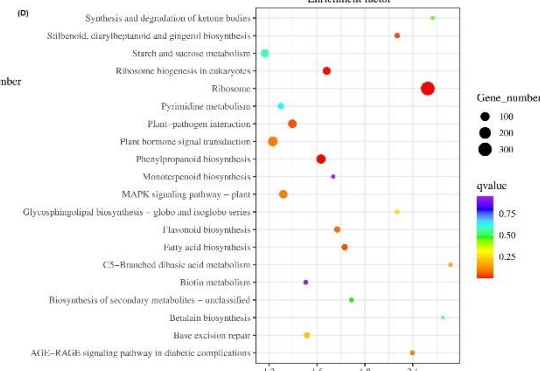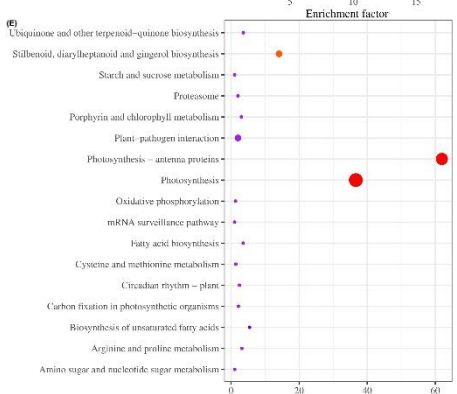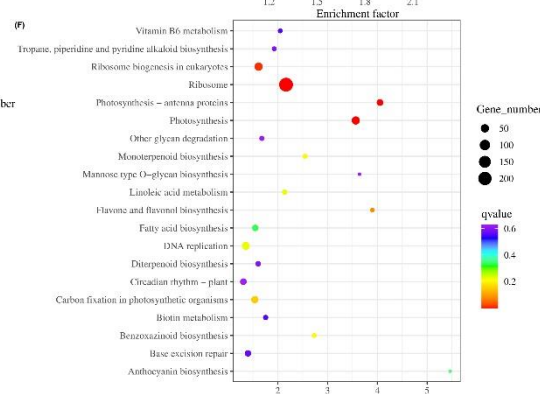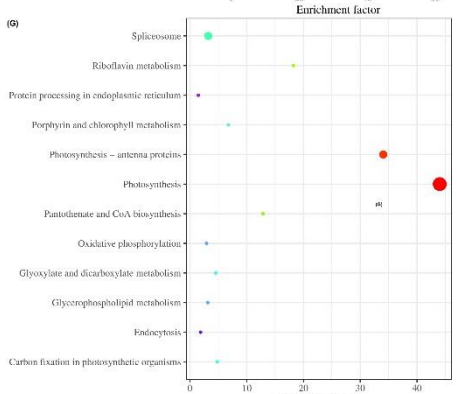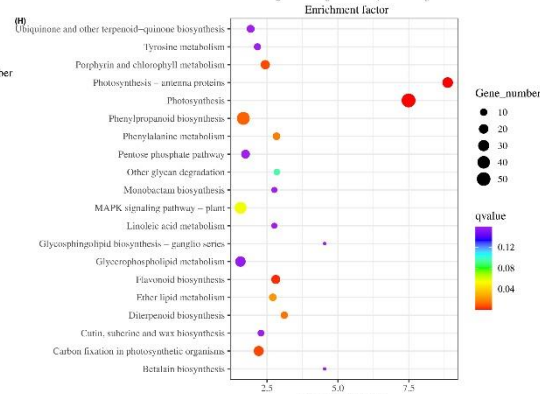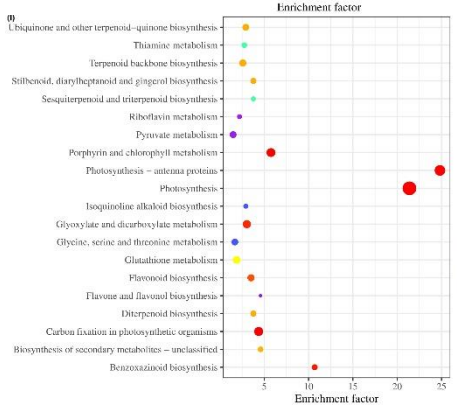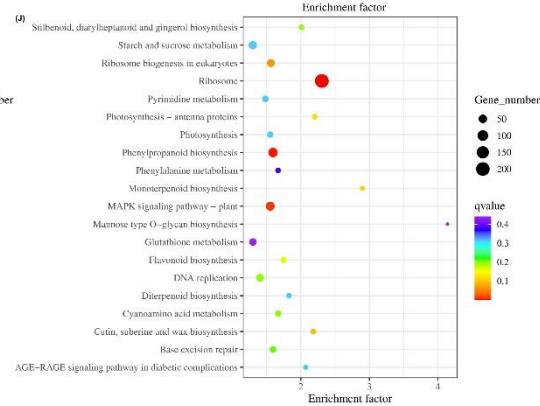

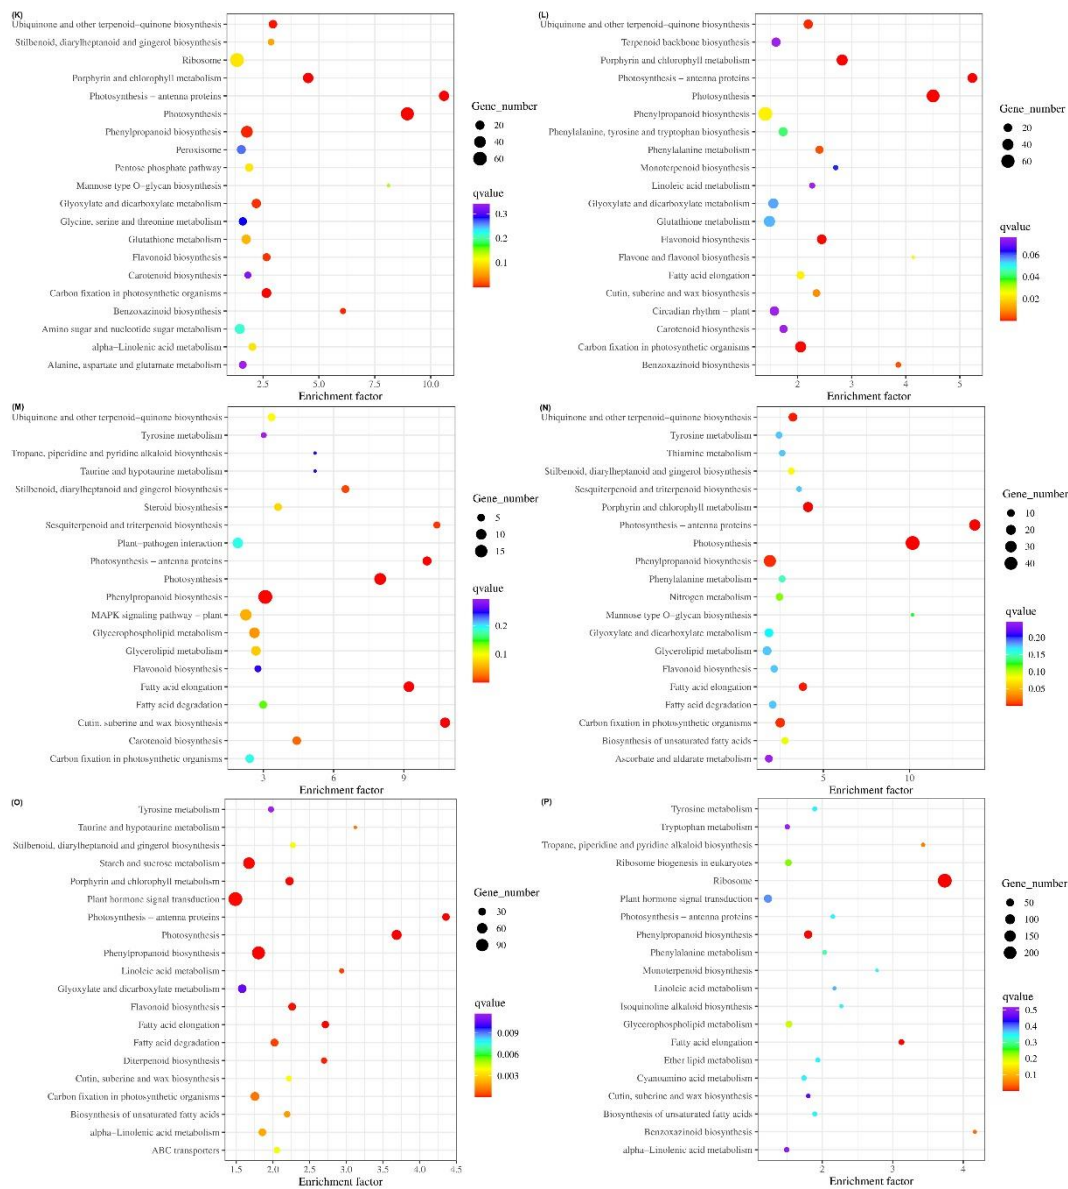

**Supplementary Figure 1** 20 top KEGG pathways enriched in differentially expressed genes (DEGs) among 16 comparisons, including MES.Red\_v\_MES.Blue (A), MES.Red\_v\_MES.White (B), MES.Red\_v\_MES.Dark (C), MES.Blue\_v\_MES.White (D), MES.Blue\_v\_MES.Dark (E), MES.White\_v\_MES.Dark (F), COL.Red\_v\_COL.Blue (G), COL.Red\_v\_COL.White (H), COL.Red\_v\_COL.Dark (I), COL.Blue\_v\_COL.White (J), COL.Blue\_v\_COL.Dark (K), COL.White\_v\_COL.Dark (L), MES.Red\_v\_COL.Red (M), MES.Blue\_v\_COL.Blue (N), MES.White\_v\_COL.White (O), and MES.Dark\_v\_COL.Dark (P).
